# Supplementary material for: Fe2Mo3O8/exfoliated graphene oxide: solid-state synthesis, characterization and anodic application in Li-ion batteries
Source: Royal Society of Chemistry journal article supplement (doi:10.1039/c8nj01847b), 2018-01-01
Supplement: c8nj01847b1.pdf [file c8nj01847b1.pdf]

Supplementary electronic information (SEI)

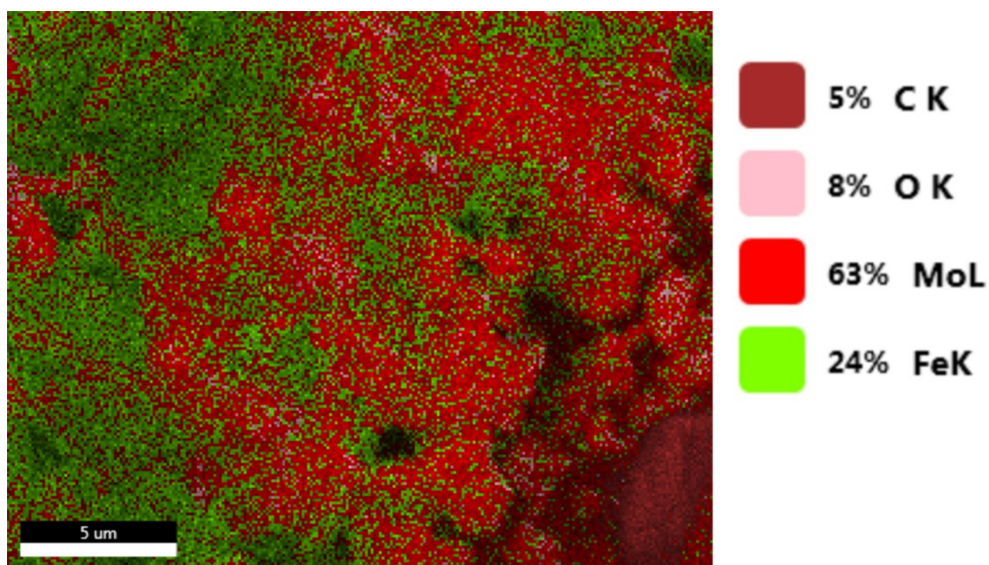

Elemental map of Fe<sub>2</sub>Mo<sub>3</sub>O<sub>8</sub>/Exfoliated Graphene Oxide; weight percentages of each element are indicated in different colors.
